# Supplementary material for: Prenatal Maternal Stress, Socioeconomic and Cultural Determinants, and Early Childhood Physical and Neurodevelopmental Outcomes: Evidence From a Prospective Cohort Study in Georgia
Source: Research Square preprint supplement (doi:10.21203/rs.3.rs-9806136/v1), 2026-07-15
Supplement: Supplementary file 1 [file e80faade4ccd8cf06e6f15c0.docx]

**Supplementary Figure 1.**

**Factors Associated With Stress During Pregnancy: Comparison Of Study (Group 1) And Control (Group 2) Groups**

**Supplementary Figure 1** compares selected occupational factors during pregnancy between the study and control groups. Overtime work was more frequent in the study group than in the control group (27 vs. 13), as were lifting heavy objects (26 vs. 22), overnight work (15 vs. 13), and working with disabled individuals (2 vs. 0). By contrast, prolonged standing during the day was reported more often in the control group (73 vs. 55), as was strenuous mental work (31 vs. 25). Sitting at the computer during the day was similarly common in both groups (55 vs. 56). Overall, the figure suggests differences in the pattern of occupational exposures during pregnancy between the two groups, particularly with regard to overtime work and physical workload.

**Supplementary Table 1.**

| **Connection of any of the listed with the job** | Group 1 (n=172) | | Group 2 (n=226) | |
| --- | --- | --- | --- | --- |
| 1. Strenuous mental work | 25 | 14.5% | 31 | 13.7% |
| Chi2-test = 0.05; p=0.816 | | | |
| 2. On feet during the day | 55 | 32.0% | 73 | 32.3% |
| Chi2-test = 0.004; p=0.945 | | | |
| 3. Lifting heavy objects | 26 | 15.1% | 22 | 9.7% |
| Chi2-test = 2.66; p=0.103 | | | |
| 4. Overnight work | 15 | 8.7% | 13 | 5.8% |
| Chi2-test = 0.22; p=0.641 | | | |
| 5. Sitting at the computer during the day | 55 | 32.0% | 56 | 24.8% |
| Chi2-test = 2.51; p=0.113 | | | |
| 6. Working with the disabled or at the hospital | 2 | 1.2% | 0 | 0.0% |
| Chi2-test = 2.63; p=0.105 | | | |
| 7. Overtime work | 27 | 15.7% | 13 | 5.8% |
| Chi2-test = 10.66; p=0.001  OR=3.05 (95%CI – 1.52-6.11)* | | | |

**Among job issues: the percentage of the pregnant women with the overtime work was significantly higher in the group 1, compared to the group 2.*

**Supplementary Table 1** shows that, among the occupational factors examined, only overtime work differed significantly between groups. It was more common in Group 1 than in Group 2 (15.7% vs. 5.8%; χ² = 10.66, p = 0.001), corresponding to an approximately threefold higher odds of stress exposure (OR = 3.05; 95% CI = 1.52–6.11). No significant between-group differences were observed for the other work-related characteristics.

**Supplementary Table 2.**

| **Low ASQ–3 Gross Motor scores in children**  **in the study and control groups** | | | | | |
| --- | --- | --- | --- | --- | --- |
| Study stage | Study group | | Control group | | Chi² test, p |
|  | N | % | N | % |  |
| At birth |  |  |  |  |  |
| 1–3 months after birth | 51 | 53.70% | 28 | 29.50% | 11.40, <0.001 |
| 5–7 months after birth | 22 | 23.20% | 0 | 0.00% | 24.75, <0.001 |
| 11–13 months after birth | 18 | 18.90% | 0 | 0.00% | 19.78, <0.001 |

**Supplementary Table 2** shows that low ASQ-3 gross motor scores were significantly more frequent in the study group than in the control group at all postnatal assessment stages. At 1–3 months after birth, low gross motor scores were observed in 53.7% of children in the study group compared with 29.5% in the control group (χ² = 11.40, p < 0.001). At 5–7 months and 11–13 months, low gross motor scores remained present in 23.2% and 18.9% of the study group, respectively, whereas no such cases were identified in the control group at either time point (both p < 0.001). Overall, these findings indicate a persistently higher burden of gross motor developmental delay in the study group throughout infancy.

**Supplementary Table 3.**

| **The percentages of low ASQ–3 Fine Motor scores in children**  **in different age-groups in the study and control groups** | | | | | |
| --- | --- | --- | --- | --- | --- |
| Study stage | Study group |  | Control group |  | Chi² test, p |
|  | N | % | N | % |  |
| At birth |  |  |  |  |  |
| 1–3 months after birth | 58 | 61.10% | 12 | 12.60% | 47.61, <0.001 |
| 5–7 months after birth | 47 | 49.50% | 0 | 0.00% | 62.12, <0.001 |
| 11–13 months after birth | 36 | 37.90% | 0 | 0.00% | 44.18, <0.001 |

**Supplementary Table 3** shows that low ASQ-3 fine motor scores were significantly more frequent in the study group than in the control group at all postnatal assessment stages. At 1–3 months after birth, low fine motor scores were observed in 61.1% of children in the study group compared with 12.6% in the control group (χ² = 47.61, p < 0.001). At 5–7 months and 11–13 months, low fine motor scores remained present in 49.5% and 37.9% of the study group, respectively, whereas no such cases were identified in the control group at either time point (both p < 0.001). Overall, these findings indicate a persistently higher burden of fine motor developmental delay in the study group throughout infancy.

**Supplementary Table 4.**

| **Socio-Economic And Cultural Factors Associated With Stress During Pregnancy** | | | | | |
| --- | --- | --- | --- | --- | --- |
|  | VARIABLES | GROUP 1 (Study group) N=172 | GROUP 2 (Control group) N=226 | OR (95% CI) | P-VALUE |
| 1 | Flat area (square meters) | % | % |  |  |
|  | *<50* | 22.90% | 15.0% | 1.67 (0.70-3.99)* | Chi2-test = 77.75; p<0.001 |
|  | *51-100* | 40.0% | 49.10% | 1.45 (0.70-2.99)* |
|  | *101-130* | 22.90% | 17.30% | 1.42 (0.60-3.36)* |
|  | *131-150* | 11.40% | 15.50% | 1.42 (0.47-4.27)* |
|  | *>150* | 2.90% | 3.10% | 1.09 (0.13-9.11)* |
| 2 | Status of marriage |  |  |  |  |
|  | *I have a partner / Married* | 97.10% | 100% | Chi2-test - N/A | Chi2-test = 6.64; p=0.010 |
|  | *Not Married / Divorced* | 2.90% | 0.00% |
| 3 | Occupation |  |  |  |  |
|  | *Temporarily unemployed / Housewife* | 40.70% | 52.20% | OR=1.59 (95%CI – 1.07-2.38) | Chi2-test = 5.54; p=0.019 |
|  | *Part-time work / Distantly working from home / Employed* | 59.30% | 47.80% |
| 4 | Workduring pregnancy |  |  |  |  |
|  | *Not working* | 75.60% | 85.00% | OR=1.82 (95%CI – 1.10-3.02) | Chi2-test = 5.54; p=0.019 |
|  | *Continuing usual work during pregnancy* | 24.20% | 15.00% |
| 5 | Overtime work | 17.10% | 5.80% | OR=3.39 (95%CI – 1.20-9.61) | Chi2-test = 5.80; p=0.016 |
| 6 | Spontaneous abortion | 37.10% | 17.70% | OR=2.75(95%CI – 1.28-5.91) | Chi2-test = 7.05; p=0.008 |
| 7 | Number of people living with the pregnant woman |  |  |  |  |
|  | *1 or 2* | 34.30% | 24.80% | OR=1.59 (95%CI – 1.02-2.45) | Chi2-test = 4.30; p=0.038 |
|  | *3 - 6+* | 65.70% | 75.20% |

**The difference between the distribution of participants by the flat area in the groups was significant. However odds ratio of each answer’s percentages was not significant.*

**Supplementary Table 4** shows that stress during pregnancy was significantly associated with several social and occupational factors. In particular, the study group more often reported employment during pregnancy, continuation of usual work, overtime work, prior spontaneous abortion, smaller household size, and non-married status. Among the examined factors, overtime work and previous spontaneous abortion showed particularly strong associations with stress exposure. Overall, the findings suggest that prenatal stress in this cohort was more closely related to occupational burden and limited social support than to broader socioeconomic indicators.

**Supplementary Table 5.**

| **Anthropometric Outcomes Across The First Year Of Life: Comparison Of Study Group vs. Control Group** | | | | | | | | | | | | | | | | | |
| --- | --- | --- | --- | --- | --- | --- | --- | --- | --- | --- | --- | --- | --- | --- | --- | --- | --- |
| N | Variable | Study Group (N=95) Mean | | | | | | | | Control Group (N=95) Mean | | | | | | | |
| At birth | SD | 2 Months After Birth | SD | 6 Months After Birth | SD | 12 Months After Birth | SD | At birth | SD | 2 Months After Birth | SD | 6 Months After Birth | SD | 12 Months After Birth | SD |
|  |  | Mean | Mean | Mean | Mean | Mean | Mean | Mean | Mean |
| 1 | Weight | 3056.3 | 373.2 | 4258.2 | 729.6 | 6553.6 | 744.2 | 8627.4 | 738.2 | 3391.6 | 399.7 | 5340.1 | 635.6 | 7506.8 | 762.9 | 10295.8 | 970.6 |
|  | *t-test* | *6.58* |  | *10.9* |  | *8.72* |  | *13.34* |  | *6.58* |  | *10.9* |  | *8.72* |  | *13.34* |  |
|  | *p-value* | *<0.001* |  | *<0.001* |  | *<0.001* |  | *<0.001* |  | *<0.001* |  | *<0.001* |  | *<0.001* |  | *<0.001* |  |
| 2 | Length/Height | 51.4 | 2.3 | 58 | 2.8 | 65.8 | 2.2 | 73 | 1.9 | 52.8 | 1.9 | 60.5 | 2 | 68.4 | 1.5 | 76.5 | 1.7 |
|  | *t-test* | *4.57* |  | *7.08* |  | *9.52* |  | *13.38* |  | *4.57* |  | *7.08* |  | *9.52* |  | *13.38* |  |
|  | *p-value* | *<0.001* |  | *<0.001* |  | *<0.001* |  | *<0.001* |  | *<0.001* |  | *<0.001* |  | *<0.001* |  | *<0.001* |  |
| 3 | Head Circumference | 33.2 | 2 | 38.3 | 1.6 | 42.8 | 1.7 | 45.6 | 1.5 | 34.3 | 1.1 | 39.4 | 1.1 | 44.4 | 0.8 | 47 | 0.8 |
|  | *t-test* | *4.7* |  | *5.52* |  | *8.3* |  | *8.03* |  | *4.7* |  | *5.52* |  | *8.3* |  | *8.03* |  |
|  | *p-value* | *<0.001* |  | *<0.001* |  | *<0.001* |  | *<0.001* |  | *<0.001* |  | *<0.001* |  | *<0.001* |  | *<0.001* |  |
| 4 | Chest Circumference | 31.5 | 2 | 35.6 | 1.9 | 41.8 | 1.7 | 47.3 | 1.6 | 32.8 | 1.1 | 37.1 | 1.4 | 43.2 | 0.9 | 48.9 | 1.0 |
|  | *t-test* | *5.55* |  | *6.2* |  | *7.09* |  | *8.27* |  | *5.55* |  | *6.2* |  | *7.09* |  | *8.27* |  |
|  | *p-value* | *<0.001* |  | *<0.001* |  | *<0.001* |  | *<0.001* |  | *<0.001* |  | *<0.001* |  | *<0.001* |  | *<0.001* |  |

**Supplementary Table 5** shows that children in the study group had consistently lower anthropometric measurements than controls at birth and throughout the first year of life. Mean weight, length/height, head circumference, and chest circumference were all significantly lower in the study group at birth, 2 months, 6 months, and 12 months (all p < 0.001). These findings indicate persistent growth disadvantage in the study group across infancy.

**Supplementary Table 6.**

| **Anthropometric Parameter’s Gain Across The First Year Of Life: Comparison Of Study Group vs. Control Group** | | | | | | | | | | | | | |
| --- | --- | --- | --- | --- | --- | --- | --- | --- | --- | --- | --- | --- | --- |
| N | Variable | Study Group (N-95) | | | | | | Control Group (N-95) | | | | | |
| 1-3 Months After Birth | SD | 5-7 Months After Birth | SD | 11-13 Months After Birth | SD | 1-3 Months After Birth | SD | 5-7 Months After Birth | SD | 11-13 Months After Birth | SD |
|  |  | Mean | Mean | Mean | Mean | Mean | Mean |
| 1 | Weight Gain | 1202 | 514.5 | 3497.4 | 548.7 | 5571.1 | 634.2 | 1948.5 | 503.6 | 4115.2 | 583 | 6904.3 | 852.3 |
|  | *t-test* | *10.11* |  | *7.52* |  | *12.23* |  | *10.11* |  | *7.52* |  | *12.23* |  |
|  | *p-value* | *<0.001* |  | *<0.001* |  | *<0.001* |  | *<0.001* |  | *<0.001* |  | *<0.001* |  |
| 2 | Length/Height Gain | 6.6 | 1.3 | 14.5 | 2.1 | 21.7 | 2.2 | 7.7 | 2 | 15.6 | 1.8 | 23.7 | 2.1 |
|  | *t-test* | *4.5* |  | *3.88* |  | *6.41* |  | *4.5* |  | *3.88* |  | *6.41* |  |
|  | *p-value* | *<0.001* |  | *<0.001* |  | *<0.001* |  | *<0.001* |  | *<0.001* |  | *<0.001* |  |
| 3 | Head Circumference Gain | 6.8 | 1.4 | 9.5 | 1.6 | 12.3 | 1.8 | 6.6 | 1.1 | 10.0 | 1.1 | 12.7 | 1.3 |
|  | *t-test* | *1.1* |  | *2.51* |  | *1.76* |  | *1.1* |  | *2.51* |  | *1.76* |  |
|  | *p-value* | *0.275* |  | *0.013* |  | *0.081* |  | *0.275* |  | *0.013* |  | *0.081* |  |
| 4 | Chest Circumference Gain | 4.1 | 1.8 | 10.4 | 1.6 | 15.9 | 2.1 | 4.3 | 1.2 | 10.4 | 1.1 | 16.1 | 1.5 |
|  | *t-test* | *0.9* |  | *0.005* |  | *0.76* |  | *0.9* |  | *0.005* |  | *0.76* |  |
|  | *p-value* | *0.369* |  | *0.960* |  | *0.451* |  | *0.369* |  | *0.96* |  | *0.451* |  |

**Supplementary Table 6** shows that infants in the study group had significantly lower gains in body weight and length/height than controls across the first year of life (all p < 0.001). Head circumference gain differed significantly only at 5–7 months (p = 0.013), while chest circumference gain did not differ significantly between groups at any time point. Overall, these findings indicate less favorable postnatal growth dynamics in the study group.

**Supplementary Table 7.**

| **Prevalence By Developmental Delays/Low Scores According To ASQ-3 Domains:**  **Comparison Of Study Group vs. Control Group** | | | | | | | | | | | | | |
| --- | --- | --- | --- | --- | --- | --- | --- | --- | --- | --- | --- | --- | --- |
| N | Variable | Study Group (N=95) | | | | | | Control Group (N=95) | | | | | |
| 1-3 Months After Birth | % | 5-7 Months After Birth | % | 11-13 Months After Birth | % | 1-3 Months After Birth | % | 5-7 Months After Birth | % | 11-13 Months After Birth | % |
|  |  | N | N | N | N | N | N |
| 1 | Gross Motor | 51 | 53.7 | 22 | 23.20% | 18 | 18.90% | 28 | 29.50% | 0 | 0.00% | 0 | 0.00% |
|  | *Chi² test* | *11.4* |  | *24.75* |  | *19.78* |  | *11.4* |  | *24.75* |  | *19.78* |  |
|  | *p-value* | *<0.001* |  | *<0.001* |  | *<0.001* |  | *<0.001* |  | *<0.001* |  | *<0.001* |  |
| 2 | Fine Motor | 58 | 61.10% | 47 | 49.50% | 36 | 37.90% | 12 | 12.60% | 0 | 0.00% | 0 | 0.00% |
|  | *Chi² test* | *47.61* |  | *62.12* |  | *44.18* |  | *47.61* |  | *62.12* |  | *44.18* |  |
|  | *p-value* | *<0.001* |  | *<0.001* |  | *<0.001* |  | *<0.001* |  | *<0.001* |  | *<0.001* |  |
| 3 | Communication | 69 | 72.60% | 78 | 82.10% | 75 | 78.9 | 28 | 29.50% | 7 | 7.40% | 7 | 7.40% |
|  | *Chi² test* | *35.21* |  | *106.75* |  | *98.68* |  | *35.21* |  | *106.75* |  | *98.68* |  |
|  | *p-value* | *<0.001* |  | *<0.001* |  | *<0.001* |  | *<0.001* |  | *<0.001* |  | *<0.001* |  |
| 4 | Problem Solving | 76 | 80% | 91 | 95.80% | 91 | 95.80% | 26 | 27.40% | 4 | 4.20% | 4 | 4.20% |
|  | *Chi² test* | *52.64* |  | *158.51* |  | *158.51* |  | *52.64* |  | *158.51* |  | *158.51* |  |
|  | *p-value* | *<0.001* |  | *<0.001* |  | *<0.001* |  | *<0.001* |  | *<0.001* |  | *<0.001* |  |
| 5 | Personal-Social | 76 | 80% | 94 | 98.90% | 92 | 96.80% | 33 | 34.70% | 2 | 2.10% | 2 | 2.10% |
|  | *Chi² test* | *39.58* |  | *177.27* |  | *169.65* |  | *39.58* |  | *177.27* |  | *169.65* |  |
|  | *p-value* | *<0.001* |  | *<0.001* |  | *<0.001* |  | *<0.001* |  | *<0.001* |  | *<0.001* |  |

**Supplementary Table 7** shows that developmental delays across all ASQ-3 domains were consistently more frequent in the study group than in the control group throughout the first year of life. The largest between-group differences were observed in communication, problem-solving, and personal-social domains, where the prevalence of low scores remained markedly higher in the study group at all follow-up points. Gross and fine motor delays were also significantly more common in the study group, although their prevalence decreased over time. All between-group differences were statistically significant (p < 0.001).

**Supplementary Figure 2.**

OR (95%Ci) 2.98 (1.55-5.70), p=0.001

**Supplementary Figure 2** shows a statistically significant association between the exposure and the examined outcome, with nearly threefold higher odds in the study group compared with the control group (OR = 2.98; 95% CI = 1.55–5.70; p = 0.001). The confidence interval does not include 1.0, indicating that this association is unlikely to be due to chance.

**Supplementary Figure 3.**

OR (95%CI) 2.21 (1.13-4.33), p=0.021

**Supplementary Figure 3** shows that weakness of labor activity was more frequent in the study group than in the control group. The odds of this complication were significantly higher among women in the study group, with more than twofold increased odds compared with controls (OR = 2.21; 95% CI = 1.13–4.33; p = 0.021). This finding suggests an association between prenatal stress exposure and less favorable intrapartum course.

**Supplementary Figure 4.**

OR (95%CI) 2.12, p=0.028

**Supplementary Figure 4** shows that low 1-minute APGAR scores were more frequent in the study group than in the control group. The odds of a low APGAR score at 1 minute were significantly higher among infants in the study group, with approximately twofold increased odds compared with controls (OR = 2.12; p = 0.028). This finding suggests less favorable immediate neonatal condition in the stress-exposed group.

**Supplementary Table 8.**

| **Children’s body weight indicators in different age-groups in the study and control groups** | | | | | |
| --- | --- | --- | --- | --- | --- |
| Study period | Study group |  | Control group |  | t-test, p |
|  | Mean | SD | Mean | SD |  |
| At birth | 3056.3 | 373.2 | 3391.6 | 399.7 | 6.58, <0.001 |
| 1–3 months after birth | 4258.2 | 729.6 | 5340.1 | 635.6 | 10.90, <0.001 |
| 5–7 months after birth | 6553.6 | 744.2 | 7506.8 | 762.9 | 8.72, <0.001 |
| 11–13 months after birth | 8627.4 | 738.2 | 10295.8 | 970.6 | 13.34, <0.001 |

**Supplementary Table 8** shows that mean body weight was consistently lower in the study group than in the control group at birth and at all follow-up assessments during the first year of life. All between-group differences were statistically significant (p < 0.001), indicating a persistent disadvantage in weight gain among children in the study group.

**Supplementary Table 9.**

| **The number of children with low body weight in different age-groups in the study and control groups** | | | | | |
| --- | --- | --- | --- | --- | --- |
| Study stage | Study group |  | Control group |  | Chi² test, p |
|  | N | % | N | % |  |
| At birth | 5 |  | 0 | 0 | 5.11, 0.024 |
| 1–3 months after birth | 48 | 0.505 | 0 | 0 | 63.89, <0.001 |
| 5–7 months after birth | 29 | 0.305 | 7 | 0.069 | 16.50, <0.001 |
| 11–13 months after birth | 13 | 0.137 | 7 | 0.069 | 2.00, 0.157 |

**Supplementary Table 9** shows that low body weight was more frequent in the study group than in the control group from birth through 5–7 months. The between-group differences were statistically significant at birth, 1–3 months, and 5–7 months, whereas by 11–13 months the difference was no longer significant. These findings suggest that the disadvantage in body weight was most pronounced during early infancy.

**Supplementary Table 10.**

| **The indicators of child body length (height) in different age-groups in the study and control groups** | | | | | |
| --- | --- | --- | --- | --- | --- |
| Study period | Study group |  | Control group |  | t-test, p |
|  | Mean | SD | Mean | SD |  |
| At birth | 51.4 | 2.3 | 52.8 | 1.9 | 4.57, <0.001 |
| 1–3 months after birth | 58 | 2.8 | 60.5 | 2 | 7.08, <0.001 |
| 5–7 months after birth | 65.8 | 2.2 | 68.4 | 1.5 | 9.52, <0.001 |
| 11–13 months after birth | 73 | 1.9 | 76.5 | 1.7 | 13.38, <0.001 |

**Supplementary Table 10** shows that mean body length/height was consistently lower in the study group than in the control group at birth and at all follow-up assessments during the first year of life. All between-group differences were statistically significant (p < 0.001), indicating persistent disadvantage in linear growth among children in the study group.

**Supplementary Table 11.**

| **The indicators of child head circumference in different age-groups in the study and control groups** | | | | | |
| --- | --- | --- | --- | --- | --- |
| Study period | Study group |  | Control group |  | t-test, p |
|  | Mean | SD | Mean | SD |  |
| At birth | 33.2 | 2 | 34.3 | 1.1 | 4.70, <0.001 |
| 1–3 months after birth | 38.3 | 1.6 | 39.4 | 1.1 | 5.52, <0.001 |
| 5–7 months after birth | 42.8 | 1.7 | 44.4 | 0.8 | 8.30, <0.001 |
| 11–13 months after birth | 45.6 | 1.5 | 47 | 0.8 | 8.03, <0.001 |

**Supplementary Table 11** shows that mean head circumference was consistently lower in the study group than in the control group at birth and at all follow-up assessments during the first year of life. All between-group differences were statistically significant (p < 0.001), indicating persistently less favorable head growth among children in the study group.

**Supplementary Table 12.**

| **The indicators of child chest circumference in different age-groups in the study and control groups** | | | | | |
| --- | --- | --- | --- | --- | --- |
| Study period | Study group |  | Control group |  | t-test, p |
|  | Mean | SD | Mean | SD |  |
| At birth | 31.5 | 2 | 32.8 | 1.1 | 5.55, <0.001 |
| 1–3 months after birth | 35.6 | 1.9 | 37.1 | 1.4 | 6.20, <0.001 |
| 5–7 months after birth | 41.8 | 1.7 | 43.2 | 0.9 | 7.09, <0.001 |
| 11–13 months after birth | 47.3 | 1.6 | 48.9 | 1 | 8.27, <0.001 |

**Supplementary Table 12** shows that mean chest circumference was consistently lower in the study group than in the control group at birth and at all follow-up assessments during the first year of life. All between-group differences were statistically significant (p < 0.001), indicating persistently less favorable chest growth among children in the study group.

**Supplementary Figure 5.**

**ASQ-3 Identified Anxiety In The Study And Control Groups**

**Supplementary Figure 5** shows that ASQ-3–identified anxiety was significantly more frequent in the study group than in the control group at both follow-up assessments. At 5–7 months after birth, anxiety-related concerns were identified in 28.1% of infants in the study group, whereas no such cases were observed in the control group (χ² = 31.31, p < 0.001). At 11–13 months, the prevalence increased to 31.3% in the study group, compared with 1.1% in the control group (χ² = 32.25, p < 0.001). Overall, these findings indicate a markedly higher burden of anxiety-related concerns among infants in the study group during later infancy.

**Supplementary Figure 6.**

**Saliva Cortisol Levels in GROUP 1 (N=95 randomly performed out of N=172)**

**>1088 pg/mL.**

**<333 pg/mL.**

**333-1088 pg/mL.**

Mild stress (saliva cortisol concentration < 333 pg/ml) – n=29 (30.5%);

Moderate stress (saliva cortisol concentration 333-1088 pg/ml) – n=33 (34.7%);

High stress (saliva cortisol concentration >1088 pg/ml) – n=33 (34.7%).

**Supplementary Figure 6** presents salivary cortisol levels in a randomly selected subsample of women from Group 1 (n = 95). Mild stress, defined as a salivary cortisol concentration below 333 pg/ml, was observed in 29 women (30.5%), whereas both moderate stress (333–1088 pg/ml) and high stress (>1088 pg/ml) were each identified in 33 women (34.7%). Overall, these findings show that nearly 70% of the assessed women in Group 1 had moderate-to-high cortisol levels, supporting the biological presence of elevated stress in this cohort.
